# Supplementary material
Source: PubMed Central journal article supplement (PMC3589125)
Supplement: NIHMS421342-supplement-01.pdf [file NIHMS421342-supplement-01.pdf]

**SUPPLEMENTAL INFORMATION FOR:**

**Mechanism of Allostery and Autoinhibition in JNK Family Kinases**

**John D. Laughlin<sup>1\*</sup>, Jerome C. Nwachukwu<sup>2\*</sup>, Mariana Figuera-Losada<sup>1</sup>, Lisa Cherry<sup>1</sup>, Kendall W. Nettles<sup>2</sup>, Philip V. LoGrasso<sup>1</sup>**

**<sup>1</sup>Department of Molecular Therapeutics, <sup>2</sup>Department of Cancer Biology**

**The Scripps Research Institute, 130 Scripps Way, Jupiter FL 33458**

**\*Contributed equally**

**Correspondence: [knettl@scripps.edu](mailto:knettl@scripps.edu), [lograsso@scripps.edu](mailto:lograsso@scripps.edu)**

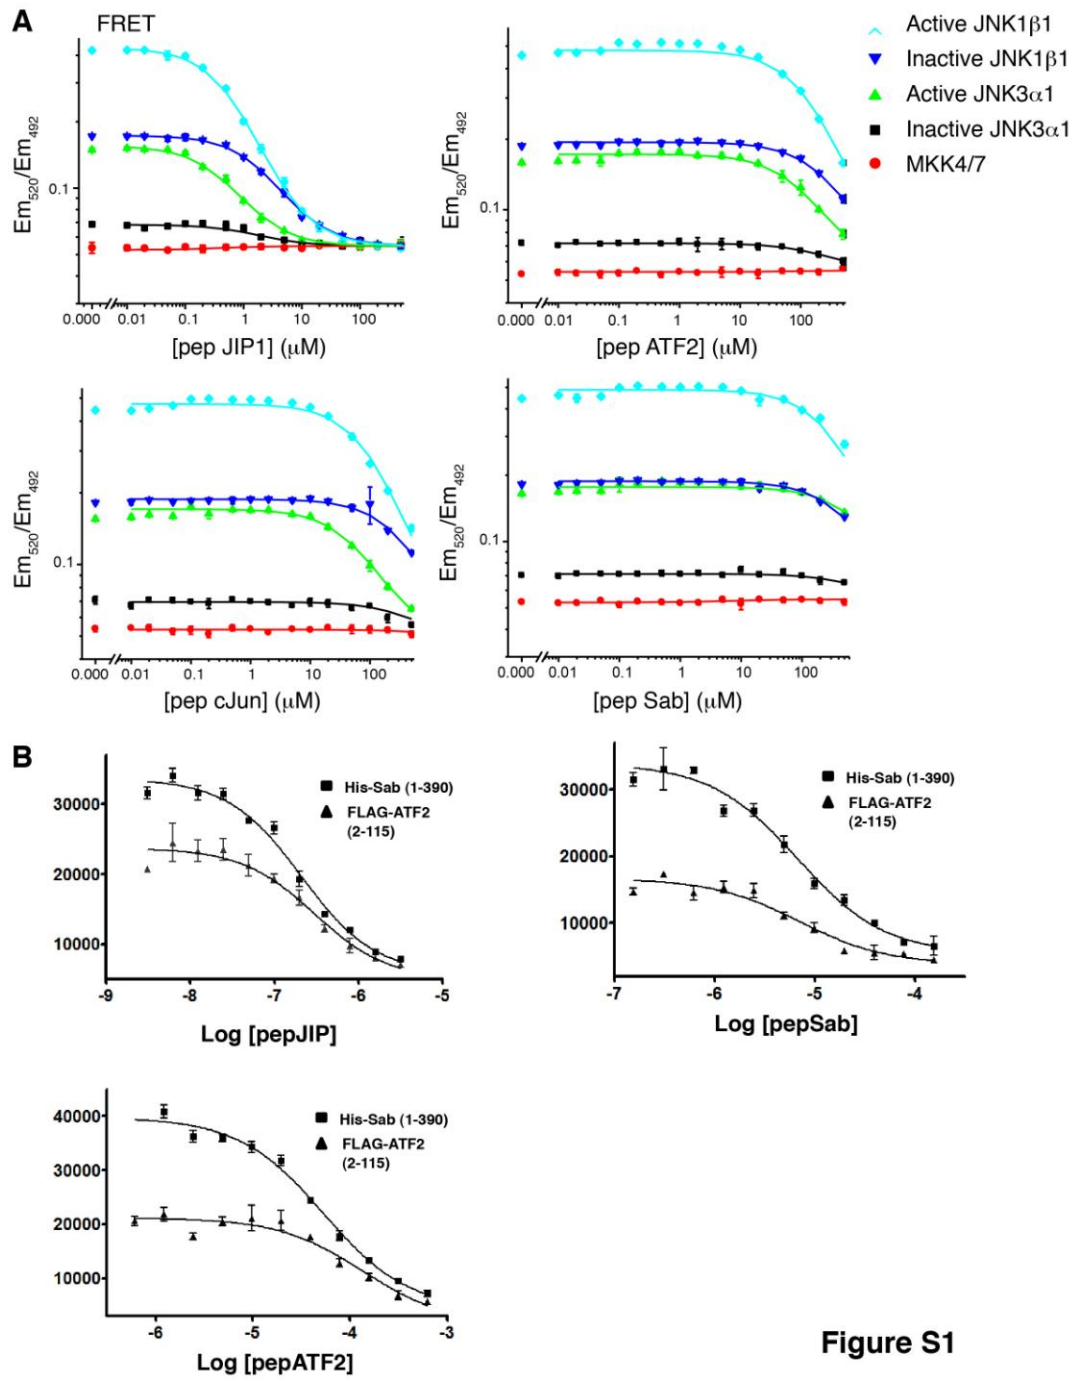

Figure S1

■ Peptide+ inhibitor  
■ Peptide  
■ Inhibitor

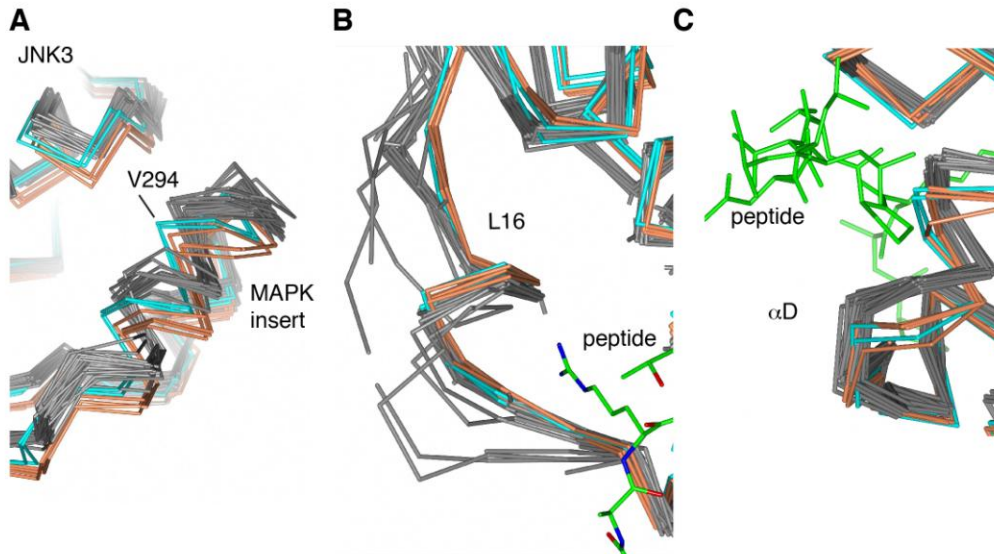

Figure S2

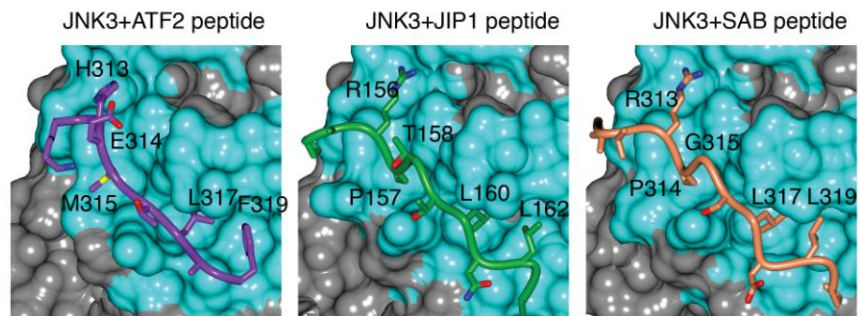

**Figure S3**

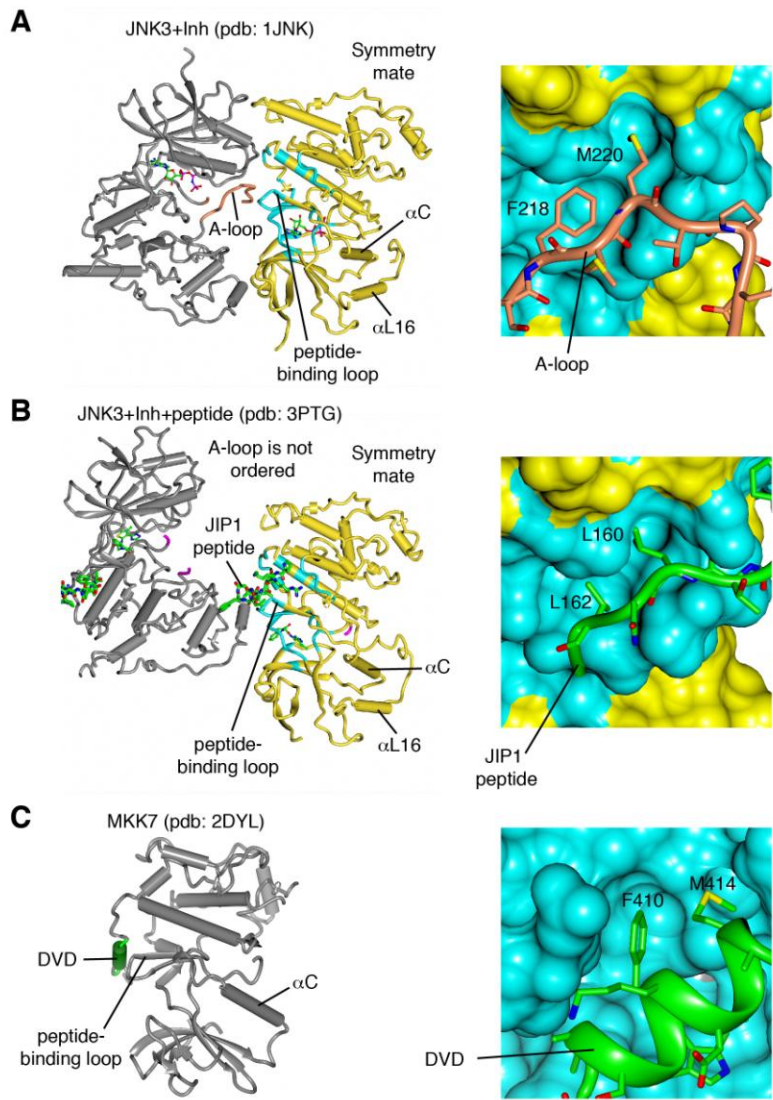

**Figure S4**

## **SUPPLEMENTAL FIGURE LEGEND**

### **Figure S1. Peptide binding data**

**A)** FRET assays were performed with the indicated protein and fluorophore labeled JIP1 peptide. Shown are inhibition curves for the indicated unlabeled peptides.

**B)** Inhibition of radioactive ( $^{33}\text{P}$ ) phosphate incorporation by JNK3 $\alpha$ 1(39-422) into either His-Sab (1-390) or FLAG-ATF2(2-115) by pepJIP, pepATF2, or pepSab.

### **Figure S2. Peptide induced changes in JNK3 conformation.**

JNK3 structures were superimposed, including 24 bound to small molecule inhibitors, 2 structures with JIP1 peptide + inhibitors, and our three novel peptide bound structures with no inhibitors. All structures were globally superimposed using CCP4MG, and shown as  $\alpha$ -carbon traces.

**A)** The MAPK insert in the *c*-terminal lobe.

**B)** Peptide induced positioning of L16.

**C)** Peptide induced shifts in  $\alpha$ D.

### **Figure S3. Overall view of binding of peptides to JNK3 in the absence of inhibitors**

Our novel JNK3 structures were shown as surface, with the indicated peptides shown as worms with cylinder side chains.

### **Figure S4. A-loop binding to the neighboring JNK3 peptide-binding site**

**A)** In the absence of peptides, the A-loop can dock in between the  $\alpha$ C helix and the peptide-docking site on the symmetry related molecule.

**B)** In the peptide bound structure, the neighbor's peptide binding site is bound by the peptide, and the A-loop is disordered.

**C)** The structure of MKK7 shows that the *c*-terminal DVD domain docks into the peptide-binding site using an identical epitope to that found in the JNK activation loop, involving, Phe and Met residues. This suggests that JNKs may dock similarly onto MKK7.

**Supplemental Table S1A. Data collection and refinement statistics for novel structures of JNK3-peptide complexes**

|                                       | JNK3+ATF2            | JNK3+JIP                                      | JNK3+Sab             |
|---------------------------------------|----------------------|-----------------------------------------------|----------------------|
| <b>Data Collection</b>                |                      |                                               |                      |
| Space group                           | P3 <sub>1</sub> 2 1  | P2 <sub>1</sub> 2 <sub>1</sub> 2 <sub>1</sub> | P3 <sub>1</sub>      |
| a, b, c (Å)                           | 84.58, 84.58, 127.06 | 63.21, 83.71, 83.92                           | 84.52, 84.52, 127.25 |
| $\alpha, \beta, \gamma$ (°)           | 90.0, 90.0, 120.0    | 90.0, 90.0, 90.0                              | 90.0, 90.0, 120.0    |
| Resolution (Å)                        | 40.1 – 3.0           | 37.5 – 2.0                                    | 36.7 – 2.1           |
| I/ $\sigma$                           | 21.9 (3.1)           | 49.3 (3.7)                                    | 33.3 (3.2)           |
| R <sub>merge</sub>                    | 0.13 (0.51)          | 0.07 (0.55)                                   | 0.04 (0.45)          |
| Completeness (%)                      | 100 (100)            | 91.8 (84.0)                                   | 94.1 (86.0)          |
| Multiplicity                          | 5.9 (5.9)            | 7.2 (7.4)                                     | 5.5 (5.8)            |
| <b>Refinement</b>                     |                      |                                               |                      |
| R <sub>work</sub> / R <sub>free</sub> | 21.63 / 26.85        | 20.86 / 23.94                                 | 18.61 / 23.50        |
| Mean B value (Å <sup>2</sup> )        |                      |                                               |                      |
| All atoms                             | 52.6                 | 48.3                                          | 45.7                 |
| Protein                               | 50.3                 | 37.2                                          | 29.3                 |
| Water                                 | 9.8                  | 38.8                                          | 45.3                 |
| Rms deviations                        |                      |                                               |                      |
| Bond lengths (Å)                      | 0.003                | 0.003                                         | 0.008                |
| Bond angles (°)                       | 0.845                | 0.720                                         | 1.123                |

**Supplemental Table S1B. List of published human JNK3 structures**

| PDB         | Res (Å) | Space group | Peptide |
|-------------|---------|-------------|---------|
| <b>1JNK</b> | 2.30    | P 21 21 21  |         |
| <b>1PMN</b> | 2.20    | P 21 21 21  |         |
| <b>1PMQ</b> | 2.20    | P 21 21 21  |         |
| <b>1PMU</b> | 2.70    | P 21 21 21  |         |
| <b>1PMV</b> | 2.50    | P 21 21 21  |         |
| <b>2B1P</b> | 1.90    | P 21 21 21  |         |
| <b>2EXC</b> | 2.75    | P 21 21 21  |         |
| <b>200U</b> | 2.10    | P 21 21 21  |         |
| <b>202U</b> | 2.45    | P 21 21 21  |         |
| <b>20K1</b> | 2.40    | P 21 21 21  |         |
| <b>2P33</b> | 2.40    | P 21 21 21  |         |
| <b>2R9S</b> | 2.40    | P 21 21 21  |         |
| <b>2WAJ</b> | 2.40    | P 32 2 1    |         |
| <b>2ZDT</b> | 2.00    | P 21 21 21  |         |
| <b>2ZDU</b> | 2.50    | P 21 21 21  |         |
| <b>3CGF</b> | 3.00    | P 21 21 21  |         |
| <b>3CGO</b> | 3.00    | P 21 21 21  |         |
| <b>3DA6</b> | 2.00    | P 21 21 21  |         |
| <b>3FI2</b> | 2.28    | C 2 2 2 1   |         |
| <b>3FI3</b> | 2.20    | C 2 2 2 1   |         |

|              |      |            |      |
|--------------|------|------------|------|
| <b>3FV8</b>  | 2.28 | C 2 2 2 1  |      |
| <b>3G90</b>  | 2.40 | P 21 21 21 |      |
| <b>3G9L</b>  | 2.20 | P 21 21 21 |      |
| <b>3G9N</b>  | 2.80 | P 21 21 21 |      |
| <b>3K VX</b> | 2.40 | C 2 2 2 1  |      |
| <b>3OXI</b>  | 2.20 | P 21 21 21 | JIP1 |
| <b>3OY1</b>  | 1.70 | P 21 21 21 |      |
| <b>3PTG</b>  | 2.43 | P 21 21 21 | JIP1 |

**Supplemental Table S1C: List of published JNK1 structures**

| <b>PDB</b>  | <b>Res (Å)</b> | <b>Space group</b> | <b>Mutation</b> | <b>Peptide</b> |
|-------------|----------------|--------------------|-----------------|----------------|
| <b>2G01</b> | 3.50           | P 32 2 1           | T183E,Y185E     | JIP1           |
| <b>2GMX</b> | 3.50           | P 32 2 1           | T183E,Y185E     | JIP1           |
| <b>2H96</b> | 3.00           | P 32 2 1           | T183E,Y185E     | JIP1           |
| <b>2N03</b> | 3.20           | P 32 2 1           | T183E,Y185E     | JIP1           |
| <b>3O2M</b> | 2.70           | P 32 2 1           | T183E,Y185E     | JIP1           |
| <b>3O17</b> | 3.00           | P 32 2 1           | T183E,Y185E     | JIP1           |
| <b>1UKI</b> | 2.70           | P 21 21 21         |                 | JIP1           |
| <b>1UKH</b> | 2.35           | P 21 21 21         |                 | JIP1           |
| <b>3ELJ</b> | 1.80           | P 21 21 21         |                 |                |
| <b>3PZE</b> | 2.00           | P 21 21 21         |                 |                |
